# Supplementary material for: Association between early treatment of multiple sclerosis and patient-reported outcomes: a nationwide observational cohort study
Source: PubMed Central journal article supplement — J Neurol Neurosurg Psychiatry. 2022 Dec 7;94(4):284–9. doi: 10.1136/jnnp-2022-330169 (PMC10086460; doi:10.1136/jnnp-2022-330169), 2022-12-07
Supplement: jnnp-2022-330169supp001.pdf [file jnnp-2022-330169supp001.pdf]

## Contents

|                                                                                                                                                                               |    |
|-------------------------------------------------------------------------------------------------------------------------------------------------------------------------------|----|
| Supplementary material S1: Table of baseline patient characteristics in matched vs unmatched cohorts.....                                                                     | 2  |
| Table S1.1: MSIS: all eligible patients.....                                                                                                                                  | 2  |
| Table S1.2: MSIS: matched patients.....                                                                                                                                       | 2  |
| Table S1.3: EQ5D: all eligible patients.....                                                                                                                                  | 2  |
| Table S1.4: EQ5D: matched patients.....                                                                                                                                       | 3  |
| Table S1.5: EDSS: all eligible patients.....                                                                                                                                  | 3  |
| Table S1.6: EDSS: matched patients.....                                                                                                                                       | 3  |
| Supplementary material S2: Sensitivity analysis: Modelling longitudinal outcomes with all available data (patients are not propensity matched to early vs late cohorts) ..... | 4  |
| Table S2.1: MSIS physical subscore (generalised linear mixed model with gamma log link) .....                                                                                 | 4  |
| Table S2.2: MSIS psychological subscore (generalised linear mixed model with gamma log link).....                                                                             | 4  |
| Table S2.3: EQ5D (linear mixed model).....                                                                                                                                    | 5  |
| Table S2.4: EDSS (linear mixed model).....                                                                                                                                    | 5  |
| Supplementary material S3: First DMT used by patients in the early vs late groups for each outcome analysis (matched cohorts) .....                                           | 6  |
| S3.1: MSIS analysis .....                                                                                                                                                     | 6  |
| S3.2: EQ5D analysis .....                                                                                                                                                     | 7  |
| S3.3: EDSS analysis .....                                                                                                                                                     | 8  |
| Supplementary material S4: Full model specifications for main analyses .....                                                                                                  | 9  |
| S4.1: Analysis of MSIS after early vs late DMT .....                                                                                                                          | 9  |
| S4.2: Analysis of EQ5D after early vs late DMT .....                                                                                                                          | 10 |
| S4.3: Analysis of EDSS after early vs late DMT .....                                                                                                                          | 11 |

## SUPPLEMENTARY MATERIAL S1: TABLE OF BASELINE PATIENT CHARACTERISTICS IN MATCHED VS UNMATCHED COHORTS

**Table S1.1: MSIS: all eligible patients**

|                                                            | Early             | Late              | p      | SMD   |
|------------------------------------------------------------|-------------------|-------------------|--------|-------|
| n                                                          | 1913              | 130               |        |       |
| sex = Man (%)                                              | 590 (30.8)        | 34 (26.2)         | 0.306  | 0.104 |
| Age at onset (mean (SD))                                   | 33.65 (9.62)      | 34.49 (8.85)      | 0.333  | 0.091 |
| Calendar year of onset (median [IQR])                      | 2011 [2008, 2013] | 2009 [2007, 2011] | <0.001 | 0.482 |
| Baseline EDSS (median [IQR])                               | 1.50 [1.00, 2.25] | 1.50 [0.56, 2.00] | 0.434  | 0.044 |
| Number of relapses in first 2 years of disease (mean (SD)) | 0.88 (1.11)       | 0.75 (0.94)       | 0.218  | 0.120 |
| Onset to first DMT, years (mean (SD))                      | 0.67 (0.52)       | 2.63 (0.57)       | <0.001 | 3.604 |

**Table S1.2: MSIS: matched patients**

|                                                            | Early             | Late              | p      | SMD   |
|------------------------------------------------------------|-------------------|-------------------|--------|-------|
| n                                                          | 650               | 130               |        |       |
| sex = Man (%)                                              | 177 (27.2)        | 34 (26.2)         | 0.885  | 0.024 |
| Age at onset (mean (SD))                                   | 34.36 (9.52)      | 34.49 (8.85)      | 0.884  | 0.014 |
| Calendar year of onset (median [IQR])                      | 2011 [2009, 2013] | 2009 [2007, 2011] | <0.001 | 0.551 |
| Baseline EDSS (median [IQR])                               | 1.50 [0.81, 2.00] | 1.50 [0.56, 2.00] | 0.858  | 0.003 |
| Number of relapses in first 2 years of disease (mean (SD)) | 0.72 (0.94)       | 0.75 (0.94)       | 0.708  | 0.036 |
| Onset to first DMT, years (mean (SD))                      | 0.69 (0.53)       | 2.63 (0.57)       | <0.001 | 3.531 |

**Table S1.3: EQ5D: all eligible patients**

|                                                            | Early             | Late              | p      | SMD   |
|------------------------------------------------------------|-------------------|-------------------|--------|-------|
| n                                                          | 1764              | 115               |        |       |
| sex = Man (%)                                              | 540 (30.6)        | 32 (27.8)         | 0.600  | 0.061 |
| Age at onset (mean (SD))                                   | 33.77 (9.60)      | 34.32 (8.75)      | 0.551  | 0.060 |
| Calendar year of onset (median [IQR])                      | 2011 [2009, 2013] | 2009 [2007, 2012] | NA     | 0.494 |
| Baseline EDSS (median [IQR])                               | 1.50 [1.00, 2.06] | 1.50 [1.00, 2.00] | NA     | 0.012 |
| Number of relapses in first 2 years of disease (mean (SD)) | 0.88 (1.12)       | 0.72 (0.82)       | 0.129  | 0.164 |
| Onset to first DMT, years (mean (SD))                      | 0.67 (0.52)       | 2.62 (0.56)       | <0.001 | 3.608 |

|                                                            | Early             | Late              | p      | SMD   |
|------------------------------------------------------------|-------------------|-------------------|--------|-------|
| n                                                          | 575               | 115               |        |       |
| sex = Man (%)                                              | 172 (29.9)        | 32 (27.8)         | 0.737  | 0.046 |
| Age at onset (mean (SD))                                   | 33.72 (8.54)      | 34.32 (8.75)      | 0.500  | 0.068 |
| Calendar year of onset (median [IQR])                      | 2012 [2009, 2013] | 2009 [2007, 2012] | <0.001 | 0.552 |
| Baseline EDSS (median [IQR])                               | 1.50 [0.62, 2.00] | 1.50 [1.00, 2.00] | 0.978  | 0.025 |
| Number of relapses in first 2 years of disease (mean (SD)) | 0.68 (0.86)       | 0.72 (0.82)       | 0.661  | 0.045 |
| Onset to first DMT, years (mean (SD))                      | 0.64 (0.51)       | 2.62 (0.56)       | <0.001 | 3.658 |

**Table S1.4: EQ5D: matched patients****Table S1.5: EDSS: all eligible patients**

|                                                            | Early             | Late              | p      | SMD   |
|------------------------------------------------------------|-------------------|-------------------|--------|-------|
| n                                                          | 2340              | 179               |        |       |
| sex = Man (%)                                              | 734 (31.4)        | 50 (27.9)         | 0.383  | 0.075 |
| Age at onset (mean (SD))                                   | 34.18 (9.84)      | 35.23 (9.37)      | 0.167  | 0.109 |
| Calendar year of onset (median [IQR])                      | 2010 [2007, 2013] | 2008 [2005, 2011] | <0.001 | 0.495 |
| Baseline EDSS (median [IQR])                               | 1.5 [1.0, 2.25]   | 1.0 [0.0, 2.0]    | 0.025  | 0.134 |
| Number of relapses in first 2 years of disease (mean (SD)) | 0.92 (1.23)       | 0.79 (0.95)       | 0.186  | 0.113 |
| Onset to first DMT, years (mean (SD))                      | 0.70 (0.52)       | 2.65 (0.55)       | <0.001 | 3.609 |

**Table S1.6: EDSS: matched patients**

|                                                            | Early             | Late              | p      | SMD   |
|------------------------------------------------------------|-------------------|-------------------|--------|-------|
| n                                                          | 886               | 179               |        |       |
| sex = Man (%)                                              | 256 (28.9)        | 50 (27.9)         | 0.866  | 0.021 |
| Age at onset (mean (SD))                                   | 35.32 (9.99)      | 35.23 (9.37)      | 0.913  | 0.009 |
| Calendar year of onset (median [IQR])                      | 2010 [2007, 2013] | 2008 [2005, 2011] | <0.001 | 0.476 |
| Baseline EDSS (median [IQR])                               | 1.50 [0.50, 2.00] | 1.00 [0.00, 2.00] | 0.463  | 0.010 |
| Number of relapses in first 2 years of disease (mean (SD)) | 0.84 (1.10)       | 0.79 (0.95)       | 0.636  | 0.041 |
| Onset to first DMT, years (mean (SD))                      | 0.70 (0.52)       | 2.65 (0.55)       | <0.001 | 3.612 |

## SUPPLEMENTARY MATERIAL S2: SENSITIVITY ANALYSIS: MODELLING LONGITUDINAL OUTCOMES WITH ALL AVAILABLE DATA (PATIENTS ARE NOT PROPENSITY MATCHED TO EARLY VS LATE COHORTS)

**Table S2.1: MSIS physical subscore (generalised linear mixed model with gamma log link)**

|                                                | Estimate | 95% CI lower limit | 95%CI upper limit |
|------------------------------------------------|----------|--------------------|-------------------|
| (Intercept)                                    | 13.86    | 10.28              | 18.68             |
| Onset to DMT time (years)                      | 1.11     | 1.05               | 1.18              |
| Disease duration (years)                       | 0.99     | 0.96               | 1.02              |
| Age at onset (years over 18)                   | 1.02     | 1.01               | 1.02              |
| Male sex                                       | 0.77     | 0.71               | 0.85              |
| Calendar year at index (years over 2000)       | 0.95     | 0.95               | 0.97              |
| Number of relapses in first 2 years of disease | 1.02     | 0.99               | 1.06              |
| Baseline EDSS (in first 2 years of disease)    | 1.30     | 1.25               | 1.34              |

N=2043 patients (see table S1.1 for baseline characteristics of this cohort)

This indicates for every additional year of delay to DMT (between 0 to 4 years), severity of physical symptoms during followup (between 4-10 years) increases by 11% (95%CI 5, 18).

Other variables that were associated with worse physical symptoms during followup include older age at onset, female sex, earlier calendar year at onset, and higher baseline EDSS.

Disease duration was not associated with change in physical symptoms.

**Table S2.2: MSIS psychological subscore (generalised linear mixed model with gamma log link)**

|                                                | Estimate | 95% CI lower limit | 95%CI upper limit |
|------------------------------------------------|----------|--------------------|-------------------|
| (Intercept)                                    | 29.95    | 22.94              | 39.09             |
| Onset to DMT time (years)                      | 1.06     | 1.01               | 1.12              |
| Disease duration (years)                       | 0.98     | 0.95               | 1.00              |
| Age at onset (years over 18)                   | 1.00     | 1.00               | 1.01              |
| Male sex                                       | 0.78     | 0.72               | 0.84              |
| Calendar year at index (years over 2000)       | 0.98     | 0.96               | 0.99              |
| Number of relapses in first 2 years of disease | 1.01     | 0.98               | 1.05              |
| Baseline EDSS (in first 2 years of disease)    | 1.14     | 1.11               | 1.17              |

N=2043 patients (see table S1.1 for baseline characteristics of this cohort)

This indicates that for every additional year of delay to DMT (between 0 to 4 years), severity of psychological symptoms during followup (between 4-10 years) increases by 6% (95%CI 1, 12).

Other variables that were associated with worse psychological symptoms during followup include female sex, earlier calendar year at onset, and higher baseline EDSS.

Disease duration was not associated with change in psychological symptoms.

**Table S2.3: EQ5D (linear mixed model)**

|                                                | Estimate | 95% CI lower limit | 95%CI upper limit |
|------------------------------------------------|----------|--------------------|-------------------|
| (Intercept)                                    | 75.4     | 71.0               | 79.9              |
| Onset to DMT time (years)                      | -0.8     | -1.9               | 0.3               |
| Disease duration (years)                       | 0.3      | 0.0                | 0.5               |
| Age at index (years over 18)                   | -0.2     | -0.3               | -0.1              |
| Male sex                                       | 1.5      | -0.1               | 3.1               |
| Calendar year at index (years over 2000)       | 0.6      | 0.3                | 0.9               |
| Number of relapses in first 2 years of disease | -0.3     | -1.0               | 0.4               |
| Median EDSS in first 2 years of disease        | -3.8     | -4.4               | -3.2              |

N=1879 patients (see table S1.3 for baseline characteristics of this cohort)

This indicates that there is no significant difference to health related quality of life with delay to treatment.

Variables that were associated with worse general health related quality of life during followup include older age at onset, earlier calendar year at onset, and higher baseline EDSS.

Disease duration was not associated with change in health related quality of life.

**Table S2.4: EDSS (linear mixed model)**

|                                                | Estimate | 95% CI lower limit | 95%CI upper limit |
|------------------------------------------------|----------|--------------------|-------------------|
| (Intercept)                                    | 0.09     | -0.11              | 0.29              |
| Onset to DMT time (years)                      | 0.19     | 0.12               | 0.26              |
| Disease duration (years)                       | 0.05     | 0.05               | 0.06              |
| Age at index (years over 18)                   | 0.03     | 0.03               | 0.04              |
| Male sex                                       | 0.03     | -0.07              | 0.13              |
| Calendar year at index (years over 2000)       | -0.04    | -0.06              | -0.03             |
| Number of relapses in first 2 years of disease | 0.02     | -0.03              | 0.06              |
| Median EDSS in first 2 years of disease        | 0.65     | 0.62               | 0.69              |

N=2519 patients (see table S1.5 for baseline characteristics of this cohort)

This indicates that every year of delay to DMT (between years 0-4) is associated with a worse clinical disability as measured by higher EDSS, during followup (between years 4-10) by 0.19 points (95%CI 0.12, 0.26).

Other variables that were associated with worse EDSS during following include older age at onset, earlier calendar year at onset, and higher baseline EDSS. Disease duration was associated with worsening EDSS (0.05 points per year of disease, 95%CI 0.05, 0.06)

### SUPPLEMENTARY MATERIAL S3: FIRST DMT USED BY PATIENTS IN THE EARLY VS LATE GROUPS FOR EACH OUTCOME ANALYSIS (MATCHED COHORTS)

#### S3.1: MSIS analysis

| First DMT (MSIS analysis)                | Early | Late  |
|------------------------------------------|-------|-------|
| Alemtuzumab                              | 0.3%  | 0.0%  |
| Glatiramer acetate                       | 6.8%  | 4.6%  |
| Dimethylfumarate                         | 10.3% | 9.2%  |
| Fingolimod                               | 2.5%  | 0.8%  |
| Haematopoietic stem cell transplantation | 0.3%  | 0.0%  |
| Interferon                               | 56.8% | 56.2% |
| Mitoxantrone                             | 0.0%  | 0.8%  |
| Natalizumab                              | 13.7% | 13.8% |
| Ocrelizumab                              | 0.5%  | 0.8%  |
| Rituximab                                | 7.9%  | 13.1% |
| Teriflunomide                            | 0.9%  | 0.8%  |

| First DMT category (MSIS analysis) | Early        | Late        | p     | SMD   |
|------------------------------------|--------------|-------------|-------|-------|
| n                                  | 650          | 130         |       |       |
| First DMT, n(%)                    |              |             | 0.243 | 0.177 |
| High-efficacy *                    | 147.0 (25.3) | 37.0 (31.4) |       |       |
| Oral therapies*                    | 22.0 (3.8)   | 2.0 (1.7)   |       |       |
| Injectables*                       | 412.0 (70.9) | 79.0 (66.9) |       |       |

\* High-efficacy therapies are Alemtuzumab, Daclizumab, haematopoietic stem cell therapy, Mitoxantrone, Natalizumab, Ocrelizumab, Rituximab. Oral therapies are Dimethylfumarate, Fingolimod and Teriflunomide. Injectable therapies are Glatiramer acetate and all Interferons

**S3.2: EQ5D analysis**

| First DMT (EQ5D analysis)                | Early | Late  |
|------------------------------------------|-------|-------|
| Alemtuzumab                              | 0.2%  | 0.0%  |
| Glatiramer acetate                       | 6.3%  | 5.3%  |
| Daclizumab                               | 0.2%  | 0.0%  |
| Dimethylfumarate                         | 11.1% | 9.6%  |
| Fingolimod                               | 1.9%  | 0.9%  |
| Haematopoietic stem cell transplantation | 0.2%  | 0.0%  |
| Interferon                               | 55.9% | 55.3% |
| Mitoxantrone                             | 0.0%  | 0.9%  |
| Natalizumab                              | 14.3% | 11.4% |
| Ocrelizumab                              | 0.0%  | 0.9%  |
| Rituximab                                | 8.7%  | 14.9% |
| Teriflunomide                            | 1.2%  | 0.9%  |

| First DMT category (EQ5D analysis) | Early        | Late        | p     | SMD   |
|------------------------------------|--------------|-------------|-------|-------|
| n                                  | 575          | 115         |       |       |
| First DMT, n(%)                    |              |             | 0.488 | 0.134 |
| High-efficacy *                    | 135.0 (26.5) | 32.0 (31.1) |       |       |
| Oral therapies*                    | 18.0 (3.5)   | 2.0 (1.9)   |       |       |
| Injectables*                       | 357.0 (70.0) | 69.0 (67.0) |       |       |

\* High-efficacy therapies are Alemtuzumab, Daclizumab, haematopoietic stem cell therapy, Mitoxantrone, Natalizumab, Ocrelizumab, Rituximab. Oral therapies are Dimethylfumarate, Fingolimod and Teriflunomide. Injectable therapies are Glatiramer acetate and all Interferons

**S3.3: EDSS analysis**

| First DMT (EDSS analysis)                | Early | Late  |
|------------------------------------------|-------|-------|
| Alemtuzumab                              | 0.5%  | 0.0%  |
| Glatiramer acetate                       | 8.8%  | 6.9%  |
| Daclizumab                               | 0.1%  | 0.0%  |
| Dimethylfumarate                         | 7.0%  | 8.0%  |
| Fingolimod                               | 2.3%  | 0.0%  |
| Haematopoietic stem cell transplantation | 0.2%  | 0.0%  |
| Interferon                               | 62.2% | 61.7% |
| Mitoxantrone                             | 0.1%  | 0.6%  |
| Natalizumab                              | 11.2% | 10.9% |
| Ocrelizumab                              | 0.1%  | 0.6%  |
| Rituximab                                | 6.7%  | 10.9% |
| Teriflunomide                            | 0.8%  | 0.6%  |

| First DMT category (EDSS analysis) | Early        | Late         | p     | SMD   |
|------------------------------------|--------------|--------------|-------|-------|
| n                                  | 886          | 179          |       |       |
| First DMT, n(%)                    |              |              | 0.093 | 0.216 |
| High-efficacy *                    | 165.6 (20.2) | 40.0 (24.8)  |       |       |
| Oral therapies*                    | 26.7 (3.3)   | 1.0 (0.6)    |       |       |
| Injectables*                       | 626.4 (76.5) | 120.0 (74.5) |       |       |

\* High-efficacy therapies are Alemtuzumab, Daclizumab, haematopoietic stem cell therapy, Mitoxantrone, Natalizumab, Ocrelizumab, Rituximab. Oral therapies are Dimethylfumarate, Fingolimod and Teriflunomide. Injectable therapies are Glatiramer acetate and all Interferons



## SUPPLEMENTARY MATERIAL S4: FULL MODEL SPECIFICATIONS FOR MAIN ANALYSES

**S4.1: Analysis of MSIS after early vs late DMT** (same model for physical and psychological subscales)

Model type: Generalized linear mixed model fit by maximum likelihood

Family: Gamma (log-link)

Formula: MSIS score ~ late + year + (1 | clinic\_id) + (1 | id)

*Note that for all model formulae, “late” is a factor variable referring to the late treatment group (compared to reference group of early treatment); “year” is a numeric variable referring to disease duration in years, “clinic ID” is a factor variable referring to the treating clinic (stratifying variable) and “id” is a factor variable referring to the individual patient (stratifying variable).*

*All models are weighted to account for the variable one-to-many match ratio between patients in the early vs late treated groups.*

Model output: MSIS physical

| <i>Predictors</i>                                    | <b>outcome.gamma</b> |               |              |
|------------------------------------------------------|----------------------|---------------|--------------|
|                                                      | <i>Estimates</i>     | <i>CI</i>     | <i>p</i>     |
| (Intercept)                                          | 17.78                | 13.39 – 23.60 | <0.001       |
| late                                                 | 1.31                 | 1.09 – 1.58   | <b>0.004</b> |
| year                                                 | 0.99                 | 0.95 – 1.03   | 0.664        |
| <b>Random Effects</b>                                |                      |               |              |
| $\sigma^2$                                           | 1.25                 |               |              |
| $\tau_{00}$ id                                       | 0.00                 |               |              |
| $\tau_{00}$ clinic_id                                | 0.00                 |               |              |
| $N$ clinic_id                                        | 43                   |               |              |
| $N$ id                                               | 780                  |               |              |
| Observations                                         | 2761                 |               |              |
| Marginal R <sup>2</sup> / Conditional R <sup>2</sup> | 0.009 / NA           |               |              |

## Model output: MSIS psychological

| <i>Predictors</i>                  | <b>outcome.gamma</b> |               |          |
|------------------------------------|----------------------|---------------|----------|
|                                    | <i>Estimates</i>     | <i>CI</i>     | <i>p</i> |
| (Intercept)                        | 26.41                | 20.71 – 33.68 | <0.001   |
| late                               | 1.14                 | 0.97 – 1.34   | 0.102    |
| year                               | 0.99                 | 0.96 – 1.03   | 0.693    |
| <b>Random Effects</b>              |                      |               |          |
| $\sigma^2$                         | 0.76                 |               |          |
| $\tau_{00}$ id                     | 0.00                 |               |          |
| $\tau_{00}$ clinic_id              | 0.00                 |               |          |
| $N_{clinic\_id}$                   | 43                   |               |          |
| $N_{id}$                           | 779                  |               |          |
| Observations                       | 2755                 |               |          |
| Marginal $R^2$ / Conditional $R^2$ | 0.003 / NA           |               |          |

**S4.2:** Analysis of EQ5D after early vs late DMT

Generalized linear mixed model fit by maximum likelihood

Family: Gamma (log)

Formula: EQ5D VAS ~ late + year + (1 | clinic\_id) + (1 | id)

## Model output: EQ5D visual analogue scale

| <i>Predictors</i>                  | <b>outcome.gamma</b> |               |          |
|------------------------------------|----------------------|---------------|----------|
|                                    | <i>Estimates</i>     | <i>CI</i>     | <i>p</i> |
| (Intercept)                        | 71.63                | 67.02 – 76.56 | <0.001   |
| late                               | 0.93                 | 0.85 – 1.01   | 0.089    |
| year                               | 1.00                 | 0.99 – 1.01   | 0.814    |
| <b>Random Effects</b>              |                      |               |          |
| $\sigma^2$                         | 0.04                 |               |          |
| $\tau_{00}$ id                     | 0.03                 |               |          |
| $\tau_{00}$ clinic_id              | 0.00                 |               |          |
| ICC                                | 0.43                 |               |          |
| $N_{clinic\_id}$                   | 42                   |               |          |
| $N_{id}$                           | 681                  |               |          |
| Observations                       | 2037                 |               |          |
| Marginal $R^2$ / Conditional $R^2$ | 0.010 / 0.435        |               |          |

**S4.3: Analysis of EDSS after early vs late DMT**

Linear mixed model fit by maximum likelihood

Formula: EDSS ~ late + year + (1 | clinic\_id) + (1 | id)

| <i>Predictors</i>                  | <b>edss</b>      |             |              |
|------------------------------------|------------------|-------------|--------------|
|                                    | <i>Estimates</i> | <i>CI</i>   | <i>p</i>     |
| (Intercept)                        | 1.27             | 1.12 – 1.42 | <0.001       |
| late                               | 0.35             | 0.10 – 0.59 | <b>0.005</b> |
| year                               | 0.07             | 0.06 – 0.08 | <0.001       |
| <b>Random Effects</b>              |                  |             |              |
| $\sigma^2$                         | 0.36             |             |              |
| $\tau_{00}$ id                     | 2.17             |             |              |
| $\tau_{00}$ clinic_id              | 0.04             |             |              |
| ICC                                | 0.86             |             |              |
| $N_{\text{clinic\_id}}$            | 46               |             |              |
| $N_{\text{id}}$                    | 1065             |             |              |
| Observations                       | 4620             |             |              |
| Marginal $R^2$ / Conditional $R^2$ | 0.013 / 0.861    |             |              |
